# Supplementary material
Source: Research Square preprint supplement (doi:10.21203/rs.3.rs-9351570/v1)
Supplement: Supplementary file 1 [file 10acae985ec1add1e0d30feb.docx]

**Dissolved organic matter composition and stability in headwater catchments *of the northern hemisphere* are influenced by land use, but chemogeography persists**

**Authors:** Philipp Maurischat1,2, Sara E. Anthony3,4, Alba Camacho-Santamans5,6, Lukas Hallberg7, Carolina Jativa5,8, Abagael N. Pruitt9, Elise D. Snyder9,14, Emma M. Thrift-Cahall9, Anna E.S. Vincent9,10, Maarten Wynants7, 11, 12, Alberto Zannella13, Magdalena Zofia Bieroza7

**Supplementary Materials**

Table S1: Abiotic and biotic information of the investigated watersheds

| Catchment | ID | Land use / Land cover [%] | | | | | | Climate | | Slope [%] | | Soil | | | | | Area [km²]* |
| --- | --- | --- | --- | --- | --- | --- | --- | --- | --- | --- | --- | --- | --- | --- | --- | --- | --- |
| Crop-land | Pasture | Deciduous forest | Coniferous Forest | Urban | Wetland | Mean precipitation [mm] | Mean temperature [°C] | Mean | SD | Dominant Type | Dominant Texture | Mean pH | Topsoil  Organic carbon [%] | Hydromorphic soils [%] |
| Sweden 1 | SjoSE | 29.5 | - | 7 | 61.2 | - | - | 507.7 | 7.3 | 2.27 | 2.93 | Leptosol/Cambisol | Sandy Loam | 6.03 | 3.7 | - | 9.7 |
| Sweden 2 | AkrSE | 26.2 | - | 5 | 61.4 | - | 4.9 | 507.7 | 7.3 | 2.03 | 2.17 | Dystric Cambisol | Loam | 5.35 | 4.7 | - | 7.88 |
| Sweden 3 | GamSE | 31.5 | 10.2 | 0.2 | 55.4 | - | - | 584.9 | 7.3 | 2.14 | 2.39 | Regosol | Sandy Loam | 5.14 | 1.4 | - | 8.1 |
| Sweden 4 | TorSE | 93.2 | 3.1 | - | - | 2.2 | - | 690.4 | 8.4 | 1.52 | 1.32 | Cambisol | Loam | 6.16 | 3.27 | - | 13.07 |
| Sweden 5 | MarSE | 91.4 | - | 2.3 | - | 4.3 | - | 657.3 | 8.7 | 1.52 | 1.68 | Calcaric Cambisol | Loam | 8.22 | 1.1 | - | 10.88 |
| Sweden 6 | KalSE | 89.7 | 2 | 5.2 | - | 1.6 | - | 657.3 | 8.7 | 1.57 | 1.78 | Calcaric Cambisol | Loam | 8.22 | 1.1 | - | 42.34 |
| Sweden 7 | TvaSE | 70.6 | 3 | 13.9 | 4.9 | 5.6 | - | 798.5 | 8.2 | 1.99 | 3.38 | Dystric Cambisol | Loam | 5.38 | 4.77 | - | 16.33 |
| Sweden 8 | HagSE | 26.6 | 3.5 | 6 | 55.1 | 7 | 0.8 | 537 | 6.7 | 2 | 2.76 | Podzol/ Dystric Cambisol | Sandy Loam | 5.23 | 6.43 | - | 121.71 |
| USA 1 | SoyUS | 88.2 | 0.5 | 0.3 | - | 10.6 | 0.1 | 1062.8 | 11.5 | 1.2 | 0.98 | Luvic Phaeozem | Silt Loam | 6.4 | 2.1 | - | 87.89 |
| USA 2 | ShaUS | 59.4 | 6.4 | 10.1 | 0.3 | 12 | 11.7 | 1055.1 | 10.6 | 1.72 | 3.12 | Haplic Luvisol | Loam | 6.14 | 1.59 | - | 947.46 |
| USA 3 | KirUS | 95 | 0.1 | 0.1 | - | 4.2 | 0.1 | 1031.5 | 10.8 | 1.36 | 1.56 | Luvic Phaeozem | Silt Loam | 6.4 | 2.1 | - | 32.1 |
| USA 4 | SprUS | - | - | 0.3 | - | 98.6 | - | 981.4 | 10 | 1.89 | 1.62 | Luvic Phaeozem | Silt Loam | 6.4 | 2.1 | - | 8.97 |
| USA 5 | JudUS | 72.8 | 5.6 | 9.7 | 9.7 | 9.7 | 5.3 | 1055.1 | 10.6 | 1.53 | 2.79 | Haplic Luvisol | Loam | 6.2 | 1.6 | - | 536.27 |
| USA 6 | EagUS | 44.2 | 5.6 | 12.9 | 12.9 | 12.9 | 20.3 | 956 | 10 | 1.57 | 2.86 | Haplic Luvisol | Loam | 6.12 | 1.6 | - | 2387.21 |
| Germany 1 | ABSDE | 54.6 | 9.7 | 16.7 | 0.2 | 17.3 | - | 676.7 | 9.2 | 0.79 | 0.68 | Luvic Arenosol | Loamy Sand | 5.91 | 0.36 | - | 10.76 |
| Germany 2 | SttDE | 57.6 | 9.6 | 11.3 | 14.9 | 5 | - | 676.7 | 9.2 | 2.21 | 4.52 | Luvic Arenosol | Loamy Sand | 5.9 | 0.3 | - | 14.29 |
| Germany 3 | KoSDE | 55.3 | 29.1 | 9.7 | 1.1 | 3.6 | 0.5 | 586.7 | 9.7 | 1.56 | 2.38 | Haplic Luvisol | Silt Loam | 5.87 | 9.86 | 45 | 89.66 |
| Germany 4 | FosDE | 42.5 | 0.5 | 10.5 | - | 45.6 | - | 682.1 | 9.6 | 1.9 | 3.08 | Haplic Luvisol | Silt Loam | 6.09 | 1.56 | 0 | 58.72 |
| Germany 5 | LacDE | 30.2 | 5.2 | 8.5 | 53.6 | 1.9 | 0.5 | 665.3 | 9.8 | 2.54 | 4.17 | Haplic Podzol | Sandy Loam | 5.05 | 5.05 | 8 | 427.76 |
| Germany 6 | HumDE | 57.6 | 8.7 | 23.5 | 6 | 3.6 | - | 726 | 9.6 | 2.4 | 6.04 | Luvisol/ Cambisol | Silt Loam /Clay | 6.74 | 0.88 | 25 | 106.7 |
| Spain 1 | SFeES | - | - | 85.8 | - | - | 12 | 680 | 14.3 | 4.45 | 1.97 | Dystric Regosol | Sandy Loam | 5.66 | 1.2 | - | 2.61 |
| Spain 2 | GuaES | - | - | 93.2 | - | 0.3 | 4.6 | 662.7 | 15.6 | 4.23 | 3.75 | Dystric Regosol | Sandy Loam | 5.66 | 1.2 | - | 12.87 |
| Spain 3 | BreES | - | - | 91.1 | 7.5 | 0.1 | - | 662.7 | 15.6 | 3.98 | 3.75 | Dystric Regosol | Sandy Loam | 5.66 | 1.2 | - | 11.04 |
| Spain 4 | RieES | - | - | 96.4 | 1.6 | - | - | 662.7 | 15.6 | 4.34 | 4.09 | Dystric Regosol | Sandy Loam | 5.66 | 1.2 | - | 5.97 |
| Spain 5 | FdRES | - | - | 98.7 | - | - | - | 662.7 | 15.6 | 4.44 | 2.77 | Dystric Regosol | Sandy Loam | 5.66 | 1.2 | - | 13.07 |
| Spain 6 | CDoES | 1.2 | 0.2 | 93 | 3.6 | - | - | 680 | 14.3 | 3.53 | 2.28 | Dystric Regosol | Sandy Loam | 5.66 | 1.2 | - | 9.35 |
| Spain 7 | RdOES | - | - | 63.9 | 8.1 | 25.8 | - | 680 | 14.3 | 2.48 | 1.95 | Dystric Regosol | Sandy Loam | 5.66 | 1.2 | - | 6.78 |
| Spain 8 | MonES | - | - | 0.6 | 18.3 | 76.1 | - | 662.7 | 15.6 | 1.66 | 0.72 | Dystric Regosol | Sandy Loam | 5.66 | 1.2 | - | 1.30 |
| Spain 9 | AiPES | - | - | 22.1 | 4.8 | 70.7 | - | 662.7 | 15.6 | 2.2 | 0.84 | Dystric Regosol | Sandy Loam | 5.66 | 1.2 | - | 3.86* |
| * Upstream area of watershed from sampling point | | | | | | | | | | | | | | | | | |


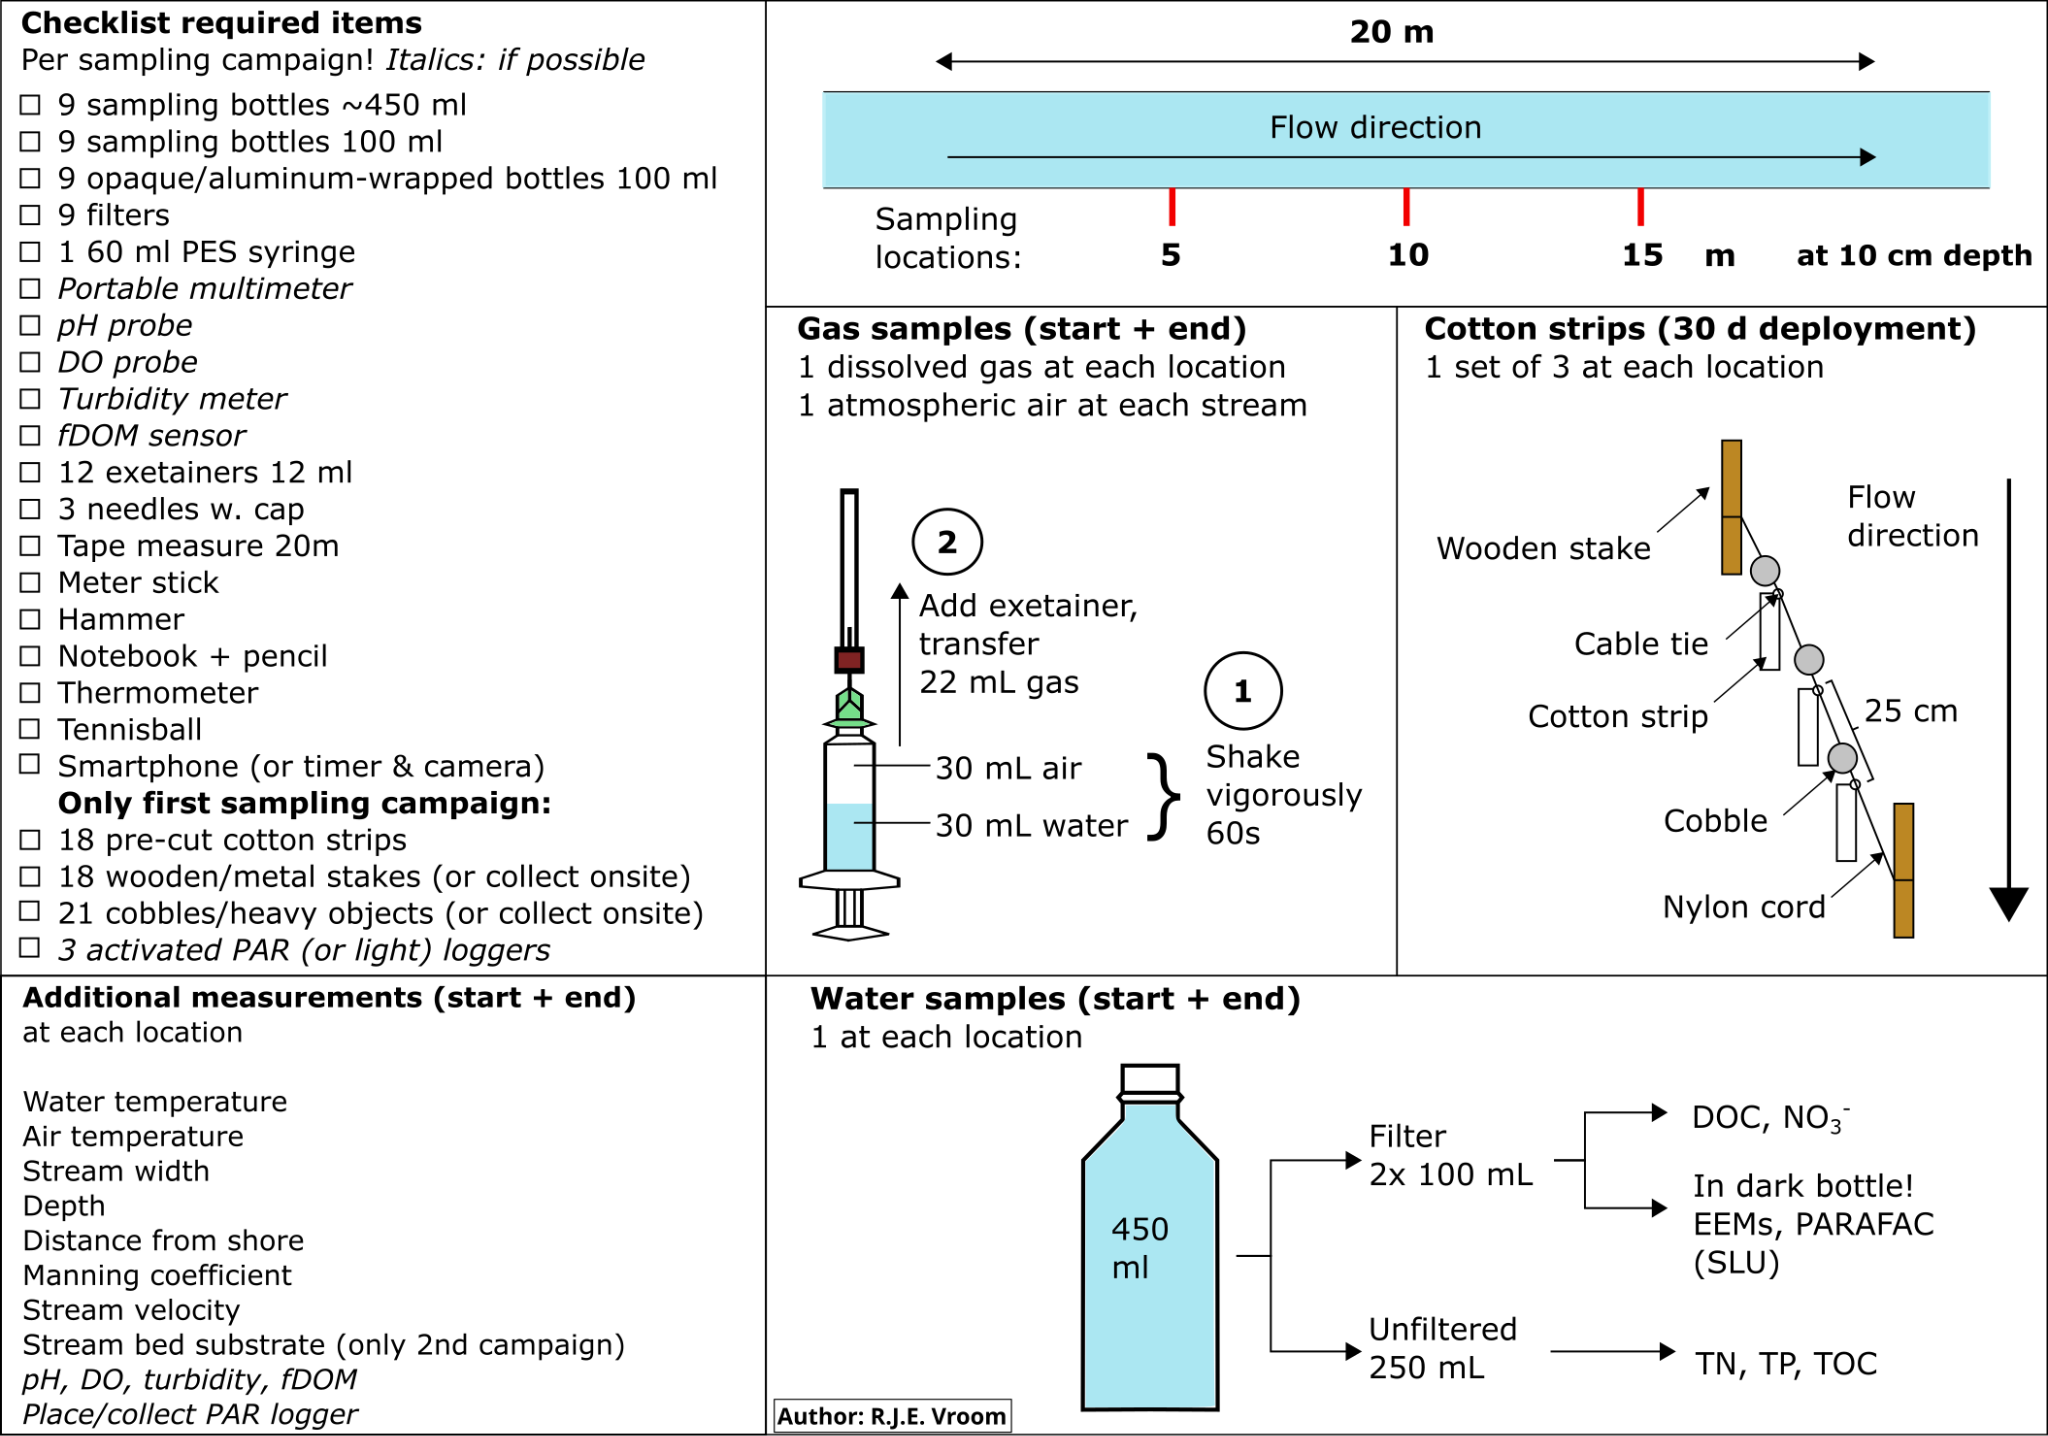


Figure S1: General sampling scheme for the coordinated distributed experiment forming the explicit guideline for CDE participant groups

Table S2: Nutrient and DOC instrument details of individual CDE partners

| Group | Parameter | Detection method | Instrument |
| --- | --- | --- | --- |
| Sweden | NH4 | Colorimetric ion analysis | Gallery Aqua Master, ThermoFischer, USA |
| NO3 | Colorimetric ion analysis | Seal, AutoAnalyzer 500 |
| SRP | Colorimetric ion analysis | Gallery Aqua Master, ThermoFischer, USA |
| DOC | High-temperature oxidation | Shimadzu TOC‑VCPH, Shimadzu, Japan |
| Spain | NH4 | Ion chromatography | Metrohm 930 Compact IC Flex, Herisau, Switzerland |
| NO3 | Ion chromatography | Metrohm 930 Compact IC Flex, Herisau, Switzerland |
| SRP | Ion chromatography | Metrohm 930 Compact IC Flex, Herisau, Switzerland |
| DOC | High-temperature oxidation | varioTOC Cube, Elementar, Langenselbold, Germany |
| Germany 1 (Hannover) | NH4 | Ion chromatography | Metrohm 930 Compact IC Flex, Herisau, Switzerland |
| NO3 | Ion chromatography | Metrohm 930 Compact IC Flex, Herisau, Switzerland |
| SRP | Ion chromatography | Metrohm 930 Compact IC Flex, Herisau, Switzerland |
| DOC | High-temperature oxidation | varioTOC Cube, Elementar, Langenselbold, Germany |
| Germany 2 (Rostock) | NH4 | Continuous Flow Analyzer | AA3, Seal Analytical, Norderstedt, Germany |
| NO3 | Continuous Flow Analyzer | AA3, Seal Analytical, Norderstedt, Germany |
| SRP | Continuous Flow Analyzer | AA3, Seal Analytical, Norderstedt, Germany |
| DOC | High-temperature catalytic oxidation | Multi N/C 2100 S, Analytic Jena, Germany |
| *USA* | *NH4* | *Colorimetric ion analysis* | *Lachat QuickChem Autoanalyzer, Lachat Instruments, Loveland, CO* |
| *NO3* | *Colorimetric ion analysis* | *Lachat QuickChem Autoanalyzer, Lachat Instruments, Loveland, CO* |
| *SRP* | *Colorimetric ion analysis* | *Lachat QuickChem Autoanalyzer, Lachat Instruments, Loveland, CO* |
| *DOC* | *High-temperature oxidation* | *Shimadzu TOC-L analyser, Columbia, Maryland, USA* |

Table S3: Greenhouse Gas analysis instrument details of individual CDE partners

| Group | Instrument | CH4 Detection method | CO2 Detection method |
| --- | --- | --- | --- |
| Sweden 1 | GasScouter G4301 | Cavity-ring-down spectrophotometer | |
| Sweden 2 | Perkin Elmer Clarus 500 GC | FID | TCD |
| Spain | Agilent Technologies 7820A GC | FID | + Methanizer |
| Germany 1 + US | Agilent Technologies 7890B GC | FID | TCD |
| Germany 2 | Shimadzu GC-2014 | FID | ECD |


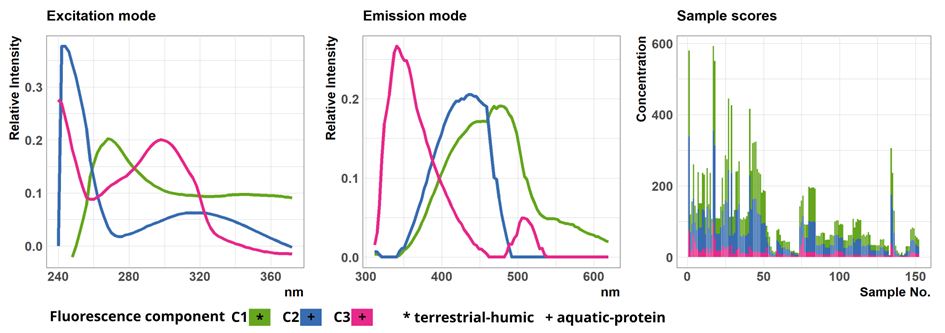


Figure S2: Excitation / emission loadings and sample scores of the fitted three component PARAFAC model. Component composition was verified using the OpenFluor database (Wünsch et al. 2014).

Table S4: Comparison results for PARAFAC resolved EEMs and the OpenFluor database

| PARAFAC-Component | Component type | Study used for verification | Study DOI |
| --- | --- | --- | --- |
| C1 | terrestrial-borne humic-like | Dainard & Gueguen (2013) | 10.1016/j.marchem.2013.10.007 |
| Chen et al. (2017) | 10.1016/j.watres.2017.05.022 |
| Yamashita et al. (2010) | 10.1016/j.dsr2.2010.02.016 |
| C2 | microbial produced and temperature sensitive | Gao and Gueguen 2017 | 10.1016/j.dsr.2016.12.014 |
| Wünsch et al. (2018) | 10.1016/j.marchem.2018.08.010 |
| Murphy et al. (2018) | 10.1021/acs.est.8b02648 |
| C3 | essential proteinaceous material | Catala et al. (2015) | 10.1038/ncomms6986 |
| Murphy et al. (2011) | 10.1021/es103015e |
| Retelletti Brogi et al. (2018) | 10.1016/j.scitotenv.2018.01.251 |

Table S5: Statistical testing documentation for group-wise comparisons. Performed was: Kruskal-Wallis test with Dunns post-hoc test including Bonferroni correction for multiple pairwise testing. Initial unadjusted alpha (α) level = 0.05.

| **Country** | | | |
| --- | --- | --- | --- |
| Variable: A254 (UV 254 nm) | | | |
| Comparison | Z | P adjusted | Sig (α<0.01) |
| Germany - Spain | 2.0814 | 0.2244 | - |
| Germany - Sweden | -6.8349 | 0.0000 | ***** |
| Spain - Sweden | -7.6677 | 0.0000 | ***** |
| Germany - USA | 0.7804 | 1.0000 | - |
| Spain - USA | -1.5340 | 0.7502 | - |
| Sweden - USA | 8.2196 | 0.0000 | ***** |
| Variable: UV E2:E3 | | | |
| Comparison | Z | P adjusted | Sig (α<0.01) |
| Germany - Spain | -2.0119 | 0.2654 | - |
| Germany - Sweden | -3.0051 | 0.0159 | - |
| Spain - Sweden | -0.2519 | 1.0000 | - |
| Germany - USA | -0.7011 | 1.0000 | - |
| Spain - USA | 1.5258 | 0.7623 | - |
| Sweden - USA | 2.4480 | 0.0862 | - |
| Variable: UV spectral slope | | | |
| Comparison | Z | P adjusted | Sig (α<0.01) |
| Germany - Spain | 0.3994 | 1.0000 | - |
| Germany - Sweden | 1.2240 | 1.0000 | - |
| Spain - Sweden | 0.5502 | 1.0000 | - |
| Germany - USA | 1.8187 | 0.4137 | - |
| Spain - USA | 1.0543 | 1.0000 | - |
| Sweden - USA | 0.7148 | 1.0000 | - |
| Variable: F Index | | | |
| Comparison | Z | P adjusted | Sig (α<0.01) |
| Germany - Spain | 3.3881 | 0.0042 | ***** |
| Germany - Sweden | 6.2132 | 0.0000 | ***** |
| Spain - Sweden | 1.3431 | 1.0000 | - |
| Germany - USA | -0.4361 | 1.0000 | - |
| Spain - USA | -3.8762 | 0.0006 | ***** |
| Sweden - USA | -7.1667 | 0.0000 | ***** |
| Variable: Freshness Index | | | |
| Comparison | Z | P adjusted | Sig (α<0.01) |
| Germany - Spain | 2.2100 | 0.1626 | - |
| Germany - Sweden | 4.8827 | 0.0000 | ***** |
| Spain - Sweden | 1.5379 | 0.7445 | - |
| Germany - USA | -0.1795 | 1.0000 | - |
| Spain - USA | -2.4435 | 0.0873 | - |
| Sweden - USA | -5.4499 | 0.0000 | ***** |
| Variable: HIX (Humification Index) | | | |
| Comparison | Z | P adjusted | Sig (α<0.01) |
| Germany - Spain | 3.7299 | 0.0011 | ***** |
| Germany - Sweden | -3.5770 | 0.0021 | ***** |
| Spain - Sweden | -6.8269 | 0.0000 | ***** |
| Germany - USA | -1.1868 | 1.0000 | - |
| Spain - USA | -4.8382 | 0.000 | ***** |
| Sweden - USA | 2.5205 | 0.0703 | - |
| Variable: DOC | | | |
| Comparison | Z | P adjusted | Sig (α<0.01) |
| Germany - Spain | 0.6351 | 1.0000 | - |
| Germany - Sweden | -7.3134 | 0.0000 | ***** |
| Spain - Sweden | -6.6227 | 0.0000 | ***** |
| Germany - USA | -4.4751 | 0.0000 | ***** |
| Spain - USA | -4.3994 | 0.0001 | ***** |
| Sweden - USA | 2.0880 | 0.2208 | - |
| Variable: SUVA254 | | | |
| Comparison | Z | P adjusted | Sig (α<0.01) |
| Germany - Spain | 1.4953 | 0.8090 | - |
| Germany - Sweden | 2.6696 | 0.0456 | - |
| Spain - Sweden | 0.6123 | 1.0000 | - |
| Germany - USA | 7.2731 | 0.0000 | ***** |
| Spain - USA | 4.8209 | 0.0000 | ***** |
| Sweden - USA | 5.2715 | 0.0000 | ***** |
| Variable: PARAFAC Component 1 | | | |
| Comparison | Z | P adjusted | Sig (α<0.01) |
| Germany - Spain | 2.4132 | 0.0949 | - |
| Germany - Sweden | -6.4360 | 0.0000 | ***** |
| Spain - Sweden | -7.7033 | 0.0000 | ***** |
| Germany - USA | 0.3238 | 1.0000 | - |
| Spain - USA | -2.2480 | 0.1474 | - |
| Sweden - USA | 7.2810 | 0.0000 | ***** |
| Variable: PARAFAC Component 2 | | | |
| Comparison | Z | P adjusted | Sig (α<0.01) |
| Germany - Spain | 2.4785 | 0.0792 | - |
| Germany - Sweden | -6.5657 | 0.0000 | ***** |
| Spain - Sweden | -7.8764 | 0.0000 | ***** |
| Germany - USA | 0.4595 | 1.0000 | - |
| Spain - USA | -2.2064 | 0.11641 | - |
| Sweden - USA | 7.5719 | 0.0000 | ***** |
| Variable: PARAFAC Component 3 | | | |
| Comparison | Z | P adjusted | Sig (α<0.01) |
| Germany - Spain | 2.6725 | 0.0452 | - |
| Germany - Sweden | -4.7267 | 0.0000 | ***** |
| Spain - Sweden | -6.6167 | 0.0000 | ***** |
| Germany - USA | 1.6878 | 0.5487 | - |
| Spain - USA | -1.4154 | 0.9416 | - |
| Sweden - USA | 6.9663 | 0.0000 | ***** |
| Variable: PARAFAC Aquatic  (Combined: Component 2+Component 3) | | | |
| Comparison | Z | P adjusted | Sig (α<0.01) |
| Germany - Spain | 2.6083 | 0.0546 | - |
| Germany - Sweden | -6.2159 | 0.0000 | ***** |
| Spain - Sweden | -7.7357 | 0.0000 | ***** |
| Germany - USA | 0.8930 | 1.0000 | - |
| Spain - USA | -1.9910 | 0.2789 | - |
| Sweden - USA | 7.6798 | 0.0000 | ***** |
| Variable: PARAFAC Aquatic RELATIVE  (Combined: Component 2+Component 3) | | | |
| Comparison | Z | P adjusted | Sig (α<0.01) |
| Germany - Spain | 0.19193855 | 1.0000 | - |
| Germany - Sweden | -0.08075227 | 1.0000 | **-** |
| Spain - Sweden | -0.26893386 | 1.0000 | **-** |
| Germany - USA | 1.26387738 | 1.0000 | - |
| Spain - USA | 0.82174806 | 1.0000 | - |
| Sweden - USA | 1.49803845 | 0.804 | **-** |
| Variable: PARAFAC HUMIC RELATIVE  (Component 1) | | | |
| Comparison | Z | P adjusted | Sig (α<0.01) |
| Germany - Spain | -0.19193855 | 1.0000 | - |
| Germany - Sweden | 0.08075227 | 1.0000 | **-** |
| Spain - Sweden | 0.26893386 | 1.0000 | - |
| Germany - USA | -1.26387738 | 1.0000 | - |
| Spain - USA | -0.82174806 | 1.0000 | - |
| Sweden - USA | -1.49803845 | 0.8047 | **-** |
| Variable: CO2-C | | | |
| Comparison | Z | P adjusted | Sig (α<0.01) |
| Germany - Spain | 0.1198 | 1.0000 | - |
| Germany - Sweden | -8.2957 | 0.0000 | ***** |
| Spain - Sweden | -6.8286 | 0.0000 | ***** |
| Germany - USA | -2.3406 | 0.1155 | - |
| Spain - USA | -2.0312 | 0.2534 | - |
| Sweden - USA | 6.1107 | 0.0000 | ***** |
| Variable: CH4-C | | | |
| Comparison | Z | P adjusted | Sig (α<0.01) |
| Germany - Spain | -0.0960 | 1.0000 | - |
| Germany - Sweden | -7.1759 | 0.0000 | ***** |
| Spain - Sweden | -5.6992 | 0.0000 | ***** |
| Germany - USA | -3.1050 | 0.0114 | - |
| Spain - USA | -2.4340 | 0.0896 | - |
| Sweden - USA | 4.1351 | 0.0002 | ***** |
| Variable: NH4-N | | | |
| Comparison | Z | P adjusted | Sig (α<0.01) |
| Germany - Spain | NA | NA | NA |
| Germany - Sweden | -0.1865 | 1.0000 | - |
| Spain - Sweden | NA | NA | NA |
| Germany - USA | 0.0680 | 1.0000 | - |
| Spain - USA | NA | NA | NA |
| Sweden - USA | 0.2465 | 1.0000 | - |
| Variable: SRP (PO4-P) | | | |
| Comparison | Z | P adjusted | Sig (α<0.01) |
| Germany - Spain | 5.5132 | 0.0000 | ***** |
| Germany - Sweden | 1.4252 | 0.9245 | - |
| Spain - Sweden | -4.2771 | 0.0001 | ***** |
| Germany - USA | 3.3557 | 0.0047 | ***** |
| Spain - USA | -3.0870 | 0.0121 | - |
| Sweden - USA | 1.7691 | 0.4613 | - |
| Variable: NO3-N | | | |
| Comparison | Z | P adjusted | Sig (α<0.01) |
| Germany - Spain | 4.1446 | 0.0002 | ***** |
| Germany - Sweden | 4.9678 | 0.0000 | ***** |
| Spain - Sweden | -0.2958 | 1.0000 | - |
| Germany - USA | 3.9469 | 0.0005 | ***** |
| Spain - USA | -1.1753 | 1.0000 | - |
| Sweden - USA | -1.1678 | 1.0000 | - |
| Variable: Water Temp | | | |
| Comparison | Z | P adjusted | Sig (α<0.01) |
| Germany - Spain | -4.5067 | 0.0000 | ***** |
| Germany - Sweden | -2.0721 | 0.2295 | - |
| Spain - Sweden | 3.0886 | 0.0121 | - |
| Germany - USA |  | 0.0000 | ***** |
| Spain - USA | -1.1869 | 1.0000 | - |
| Sweden - USA | -5.7405 | 0.0000 | ***** |
| Variable: DO (Dissolved Oxygen) | | | |
| Comparison | Z | P adjusted | Sig (α<0.01) |
| Germany - Spain | -0.5553 | 1.0000 | - |
| Germany - Sweden | -0.8538 | 1.0000 | - |
| Spain - Sweden | -0.1087 | 1.0000 | - |
| Germany - USA | -1.9497 | 0.3073 | - |
| Spain - USA | -0.9812 | 1.0000 | - |
| Sweden - USA | -1.1494 | 1.0000 | - |
| Variable: Water pH | | | |
| Comparison | Z | P adjusted | Sig (α<0.01) |
| Germany - Spain | 0.2332 | 1.0000 | - |
| Germany - Sweden | 1.6703 | 0.5691 | - |
| Spain - Sweden | 1.1010 | 1.0000 | - |
| Germany - USA | -2.8798 | 0.0239 | - |
| Spain - USA | -2.5326 | 0.0679 | - |
| Sweden - USA | -4.7129 | 0.0000 | ***** |
| Variable: Electrical Conductivity | | | |
| Comparison | Z | P adjusted | Sig (α<0.01) |
| Germany - Spain | 3.1959 | 0.0084 | ***** |
| Germany - Sweden | 5.3224 | 0.0000 | ***** |
| Spain - Sweden | 0.7708 | 1.0000 | - |
| Germany - USA | -1.5517 | 0.7244 | - |
| Spain - USA | -4.4596 | 0.0000 | ***** |
| Sweden - USA | -7.2097 | 0.0000 | ***** |
| Variable: OM stability (Mean Tensile Loss degree day) | | | |
| Comparison | Z | P adjusted | Sig (α<0.01) |
| Germany - Spain | 2.8851 | 0.0235 | - |
| Germany - Sweden | 1.6272 | 0.6222 | - |
| Spain - Sweden | -1.8139 | 0.4181 | - |
| Germany - USA | 4.0225 | 0.0003 | ***** |
| Spain - USA | 1.0173 | 1.0000 | - |
| Sweden - USA | 3.1323 | 0.0104 | - |
| **Land Use Class (LULC)** | | | |
| Variable: A254 (UV 254 nm) | | | |
| Comparison | Z | P adjusted | Sig (α<0.01) |
| Agriculture - Forest | -2.6547 | 0.0238 | - |
| Agriculture - Urban | -0.8038 | 1.0000 | - |
| Forest - Urban | 0.9076 | 1.0000 | - |
| Variable: UV E2:E3 | | | |
| Comparison | Z | P adjusted | Sig (α<0.01) |
| Agriculture - Forest | -0.6441 | 1.0000 | - |
| Agriculture - Urban | 0.5694 | 1.0000 | - |
| Forest - Urban | 0.9393 | 1.0000 | - |
| Variable: UV spectral slope | | | |
| Comparison | Z | P adjusted | Sig (α<0.01) |
| Agriculture - Forest | -1.7907 | 0.2200 | - |
| Agriculture - Urban | -4.7896 | 0.0000 | ***** |
| Forest - Urban | -3.3831 | 0.0022 | ***** |
| Variable: F Index | | | |
| Comparison | Z | P adjusted | Sig (α<0.01) |
| Agriculture - Forest | 6.9561 | 0.0000 | ***** |
| Agriculture - Urban | -1.3477 | 0.5332 | - |
| Forest - Urban | -5.6272 | 0.0000 | ***** |
| Variable: Freshness Index | | | |
| Comparison | Z | P adjusted | Sig (α<0.01) |
| Agriculture - Forest | 3.9321 | 0.0003 | ***** |
| Agriculture - Urban | -3.4839 | 0.0015 | - |
| Forest - Urban | -5.7414 | 0.0000 | ***** |
| Variable: (HIX) Humification Index | | | |
| Comparison | Z | P adjusted | Sig (α<0.01) |
| Agriculture - Forest | 2.3194 | 0.0611 | - |
| Agriculture - Urban | 2.0776 | 0.1133 | - |
| Forest - Urban | 0.5007 | 1.0000 | - |
| Variable: DOC | | | |
| Comparison | Z | P adjusted | Sig (α<0.01) |
| Agriculture - Forest | -1.0912 | 0.8256 | - |
| Agriculture - Urban | -1.5651 | 1.3526 | - |
| Forest - Urban | -0.7737 | 1.0000 | - |
| Variable: SUVA254 | | | |
| Comparison | Z | P adjusted | Sig (α<0.01) |
| Agriculture - Forest | -1.5566 | 0.3587 | - |
| Agriculture - Urban | 2.1744 | 0.0890 | - |
| Forest - Urban | 3.1565 | 0.0048 | ***** |
| Variable: PARAFAC C1 | | | |
| Comparison | Z | P adjusted | Sig (α<0.01) |
| Agriculture - Forest | -0.8858 | 1.0000 | - |
| Agriculture - Urban | -0.7270 | 1.0000 | - |
| Forest - Urban | -0.1287 | 1.0000 | - |
| Variable: PARAFAC C2 | | | |
| Comparison | Z | P adjusted | Sig (α<0.01) |
| Agriculture - Forest | -0.9133 | 1.0000 | - |
| Agriculture - Urban | -0.8944 | 1.0000 | - |
| Forest - Urban | -0.2689 | 1.0000 | - |
| Variable: PARAFAC C3 | | | |
| Comparison | Z | P adjusted | Sig (α<0.01) |
| Agriculture - Forest | -1.4287 | 0.4592 | - |
| Agriculture - Urban | -3.1848 | 0.0043 | ***** |
| Forest - Urban | -2.1004 | 0.1071 | - |
| Variable: PARAFAC Aquatic Protein  (Combined: Component 2+Component 3) | | | |
| Comparison | Z | P adjusted | Sig (α<0.01) |
| Agriculture - Forest | -1.1854 | 0.7076 | - |
| Agriculture - Urban | -1.3756 | 0.5069 | - |
| Forest - Urban | -0.5510 | 1.0000 | - |
| Variable: PARAFAC Aquatic Protein RELATIVE  (Combined: Component 2+Component 3) | | | |
| Comparison | Z | P adjusted | Sig (α<0.01) |
| Agriculture - Forest | -1.782407 | 0.2240 | - |
| Agriculture - Urban | -4.400285 | 0.0000 | * |
| Forest - Urban | -3.022090 | 0.0075 | * |
| Variable: PARAFAC terrestrial RELATIVE  (Component 1) | | | |
| Comparison | Z | P adjusted | Sig (α<0.01) |
| Agriculture - Forest | 1.782407 | 0.2240 | - |
| Agriculture - Urban | 4.400285 | 0.0000 | * |
| Forest - Urban | 3.022090 | 0.0075 | * |
| Variable: CO2-C | | | |
| Comparison | Z | P adjusted | Sig (α<0.01) |
| Agriculture - Forest | -1.0628 | 0.8636 | - |
| Agriculture - Urban | -0.3804 | 1.0000 | - |
| Forest - Urban | 0.3261 | 1.0000 | - |
| Variable: CH4-C | | | |
| Comparison | Z | P adjusted | Sig (α<0.01) |
| Agriculture - Forest | -1.1246 | 0.7823 | - |
| Agriculture - Urban | 0.3603 | 1.0000 | - |
| Forest - Urban | 1.0651 | 0.8605 | - |
| Variable: SRP (PO4-P) | | | |
| Comparison | Z | P adjusted | Sig (α<0.01) |
| Agriculture - Forest | 1.5025 | 0.3989 | - |
| Agriculture - Urban | -2.0266 | 0.1281 | - |
| Forest - Urban | -2.8618 | 0.0126 | - |
| Variable: NH4-N | | | |
| Comparison | Z | P adjusted | Sig (α<0.01) |
| Agriculture - Forest | 0.6207 | 1.000 | - |
| Agriculture - Urban | -3.9861 | 0.0002 | ***** |
| Forest - Urban | -4.0041 | 0.0002 | ***** |
| Variable: NO3-N | | | |
| Comparison | Z | P adjusted | Sig (α<0.01) |
| Agriculture - Forest | 2.9608 | 0.0092 | ***** |
| Agriculture - Urban | 0.2122 | 1.0000 | - |
| Forest - Urban | -1.6767 | 0.2808 | - |
| Variable: Water Temperature | | | |
| Comparison | Z | P adjusted | Sig (α<0.01) |
| Agriculture - Forest | 1.8176 | 0.2074 | - |
| Agriculture - Urban | -2.7433 | 0.0182 | - |
| Forest - Urban | -3.7292 | 0.0006 | ***** |
| Variable: Dissolved Oxygen (DO) | | | |
| Comparison | Z | P adjusted | Sig (α<0.01) |
| Agriculture - Forest | 2.1876 | 0.0860 | - |
| Agriculture - Urban | 4.4303 | 0.0000 | ***** |
| Forest - Urban | 2.7385 | 0.0185 | - |
| Variable: Water pH | | | |
| Comparison | Z | P adjusted | Sig (α<0.01) |
| Agriculture - Forest | 4.0432 | 0.0002 | ***** |
| Agriculture - Urban | 1.5532 | 0.3611 | - |
| Forest - Urban | -1.1377 | 0.7657 | - |
| Variable: Electrical Conductivity | | | |
| Comparison | Z | P adjusted | Sig (α<0.01) |
| Agriculture - Forest | 6.2223 | 0.0000 | ***** |
| Agriculture - Urban | -4.3296 | 0.0000 | ***** |
| Forest - Urban | -7.8223 | 0.0000 | ***** |
| Variable: OM stability (Mean Tensile Loss degree day) | | | |
| Comparison | Z | P adjusted | Sig (α<0.01) |
| Agriculture - Forest | 0.7230 | 1.0000 | - |
| Agriculture - Urban | 1.5060 | 0.3962 | - |
| Forest - Urban | 1.0628 | 0.8636 | - |


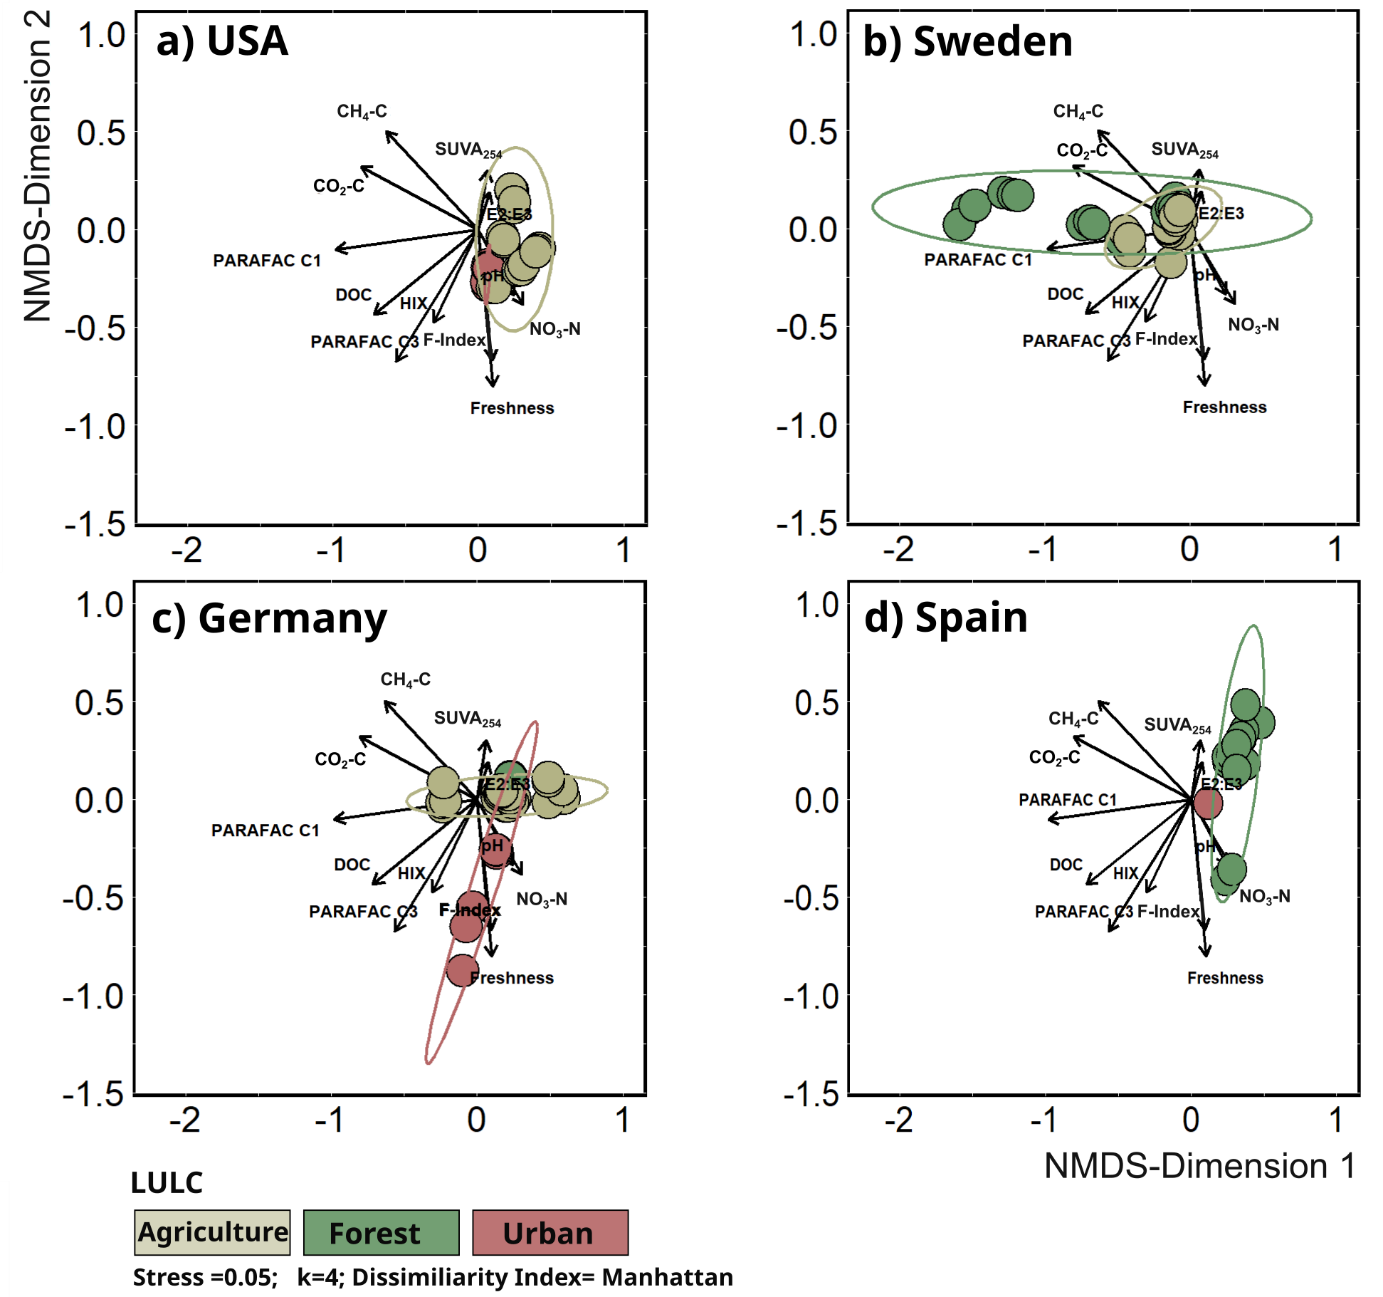


Figure S3: Non-metric dimensional scaling (NMDS) for the dataset filtered for countries with a LULC overlay. Included variable loadings were linear trend fitted onto the NMDS plane, collinear variables were excluded. Ellipses are calculated on assumed normal distribution for 95 % probability. Note that no explained variance can be given for NMDS ordination plots.
